# THE JOURNAL OF NEUROPSYCHIATRY and Clinical Neurosciences

The Official Journal of the American Neuropsychiatric Association

## In this issue:

- Neuroanatomy of Dopamine: Reward and Addiction
- Neuropsychiatry of Vitamin B<sub>12</sub> Deficiency in Elderly Patients
- Mood Response to Deep Brain Stimulation of the Subthalamic Nucleus in Parkinson's Disease
- Comparison of Personality Characteristics on the Bear-Fedio Inventory Between Patients With Epilepsy and Those With Non-Epileptic Seizures
- Impulse-Control Disorders in Gilles de la Tourette Syndrome

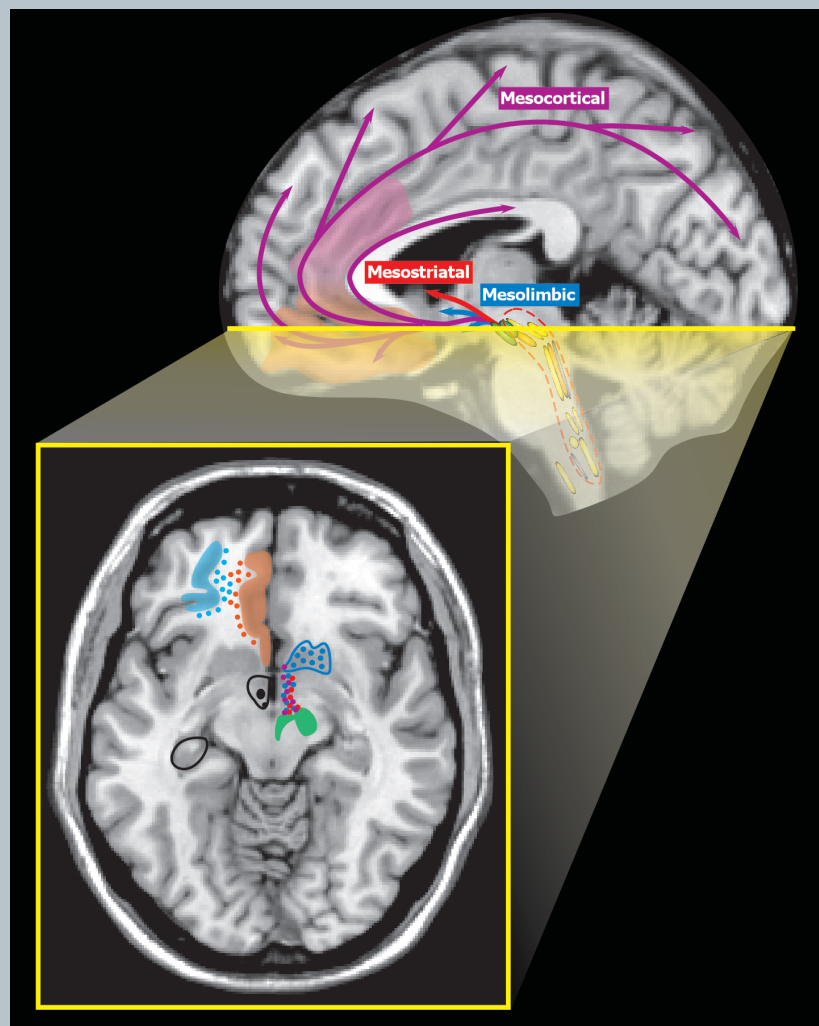

Source: https://neuro.psychiatryonline.org/doi/suppl/10.1176/jnp.2012.24.issue-1/suppl_file/cover.pdf
