# A Vital Resource to Help You Treat Traumatic Brain Injury

## Textbook of Traumatic Brain Injury, Second Edition

Edited by **Jonathan M. Silver, M.D.,**  
**Thomas W. McAllister, M.D.,** and **Stuart C. Yudofsky, M.D.**

As soldiers and combat veterans have returned from the wars in Iraq and Afghanistan traumatic brain injury (TBI) has been identified as the “signature injury” of those wars. This new edition of *Textbook of Traumatic Brain Injury* has been thoroughly revised and updated from the 2005 first edition to reflect the exponential expansion of research and clinical data amassed in the intervening years. Each chapter was written and reviewed by the foremost authorities in neuropsychiatry, neurology, rehabilitation medicine, and the other specialties who assess, diagnose, and treat these patients.

Key features include:

- New chapters on epidemiology, neuropathology, and genetics of TBI
- A new chapter on TBI in the military
- A new chapter on posttraumatic stress disorder (PTSD), which emphasizes the common co-occurrence of TBI and PTSD
- Enhanced coverage of psychopharmacology and psychotherapy for the psychiatric symptoms associated with TBI
- Information on the social ramifications of TBI so that clinicians will better understand and help their patients cope with the complex legal, financial, and insurance-based struggles their patients who have sustained TBI encounter
- Chapters that are complete, readable, and relevant in themselves, reflecting the editors’ understanding that few readers digest a work of this magnitude in a single sitting
- A Foreword written by Bob Woodruff (the ABC World News correspondent who sustained a TBI while covering the war in Iraq) and his wife, Lee Woodruff, who underscore that although this volume is intended to be read primarily by professionals, patients and families may also find the information in the textbook to be of keen interest and practical application.

The book has been closely edited to achieve a level of writing that is consistent and engaging and that addresses the needs of all medical professionals—including the full range of mental health professionals—who care for people who suffer from TBI. This new edition of *Textbook of Traumatic Brain Injury* represents a huge step forward for the diagnosis and treatment of TBI.

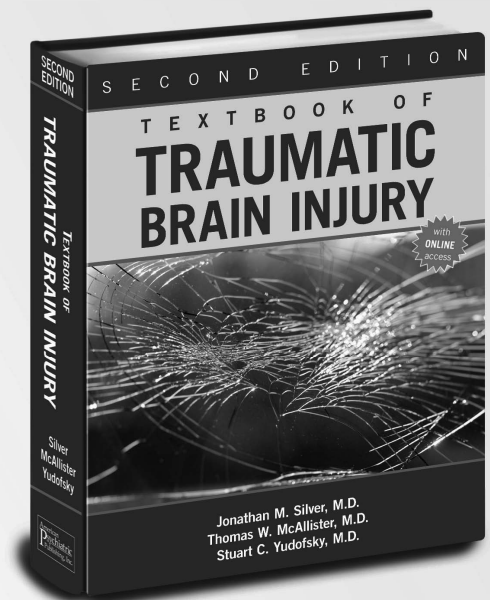

2011 • 704 pages • ISBN 978-1-58562-357-0  
Hardcover • \$169.00 • Item #62357

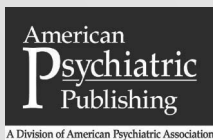

The *First and Last* Word in Psychiatry

Order Online: [www.appi.org](http://www.appi.org)  
Phone: 1-800-368-5777 • Fax: 703-907-1091  
Email: [appi@psych.org](mailto:appi@psych.org)

Priority Code AH1210

Find us on Facebook and Twitter.

**20% Discount**  
**For American Psychiatric**  
**Association Members!**

**25% Discount**  
**For APA**  
**Members-in-Training**

# Read All About It!

Sign up for the Psychiatric News alert!

## PSYCHIATRIC NEWS alert

The Voice of the American Psychiatric Association and the Psychiatric Community

*Psychiatric News* has a new way to keep you informed between issues—a daily news service at [alert.psychiatricnews.org](http://alert.psychiatricnews.org).

Sign up to receive news alerts automatically through email and RSS feeds.

**Psychiatric News Alert** reports on breaking news on topics of importance to psychiatrists—such as clinical psychiatry, psychiatric research, legislative and regulatory updates, health policy, APA advocacy initiatives, and lifelong learning—and provides links to further information in *Psychiatric News*. Highlights also include major findings reported in APA's leading periodicals, the *American Journal of Psychiatry* and *Psychiatric Services*.

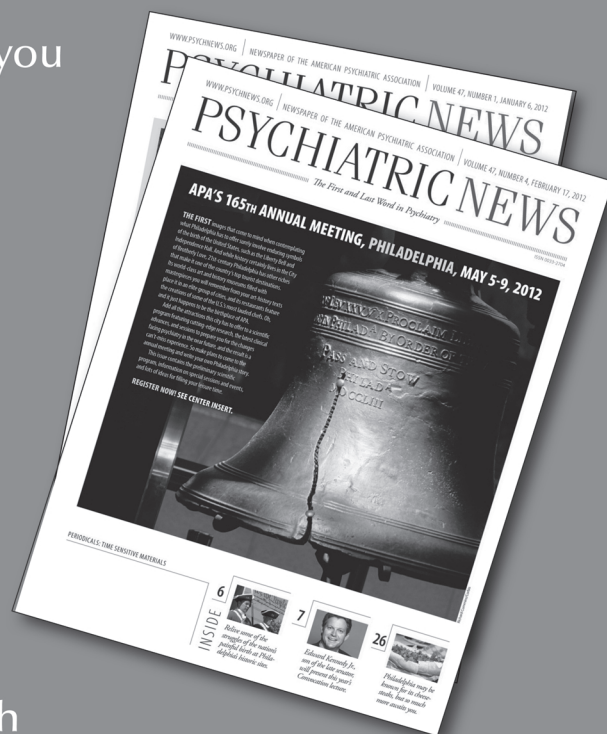

Sign up now at [alert.psychiatricnews.org](http://alert.psychiatricnews.org)

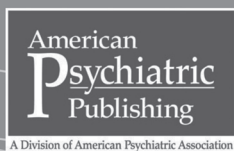

The *First* and *Last* Word in Psychiatry  
[www.appi.org](http://www.appi.org) | [psychnews.org](http://psychnews.org) • [appi@psych.org](mailto:appi@psych.org) • 1-800-368-5777

Find us on  and .

Priority Code AH1212
